# Supplementary material for: Gcm: a novel anti-inflammatory transcriptional cascade conserved from flies to humans
Source: bioRxiv or medRxiv preprint supplement (doi:10.1101/2022.05.29.493864), 2022-05-29
Supplement: Supplementary file [file media-1.pdf]

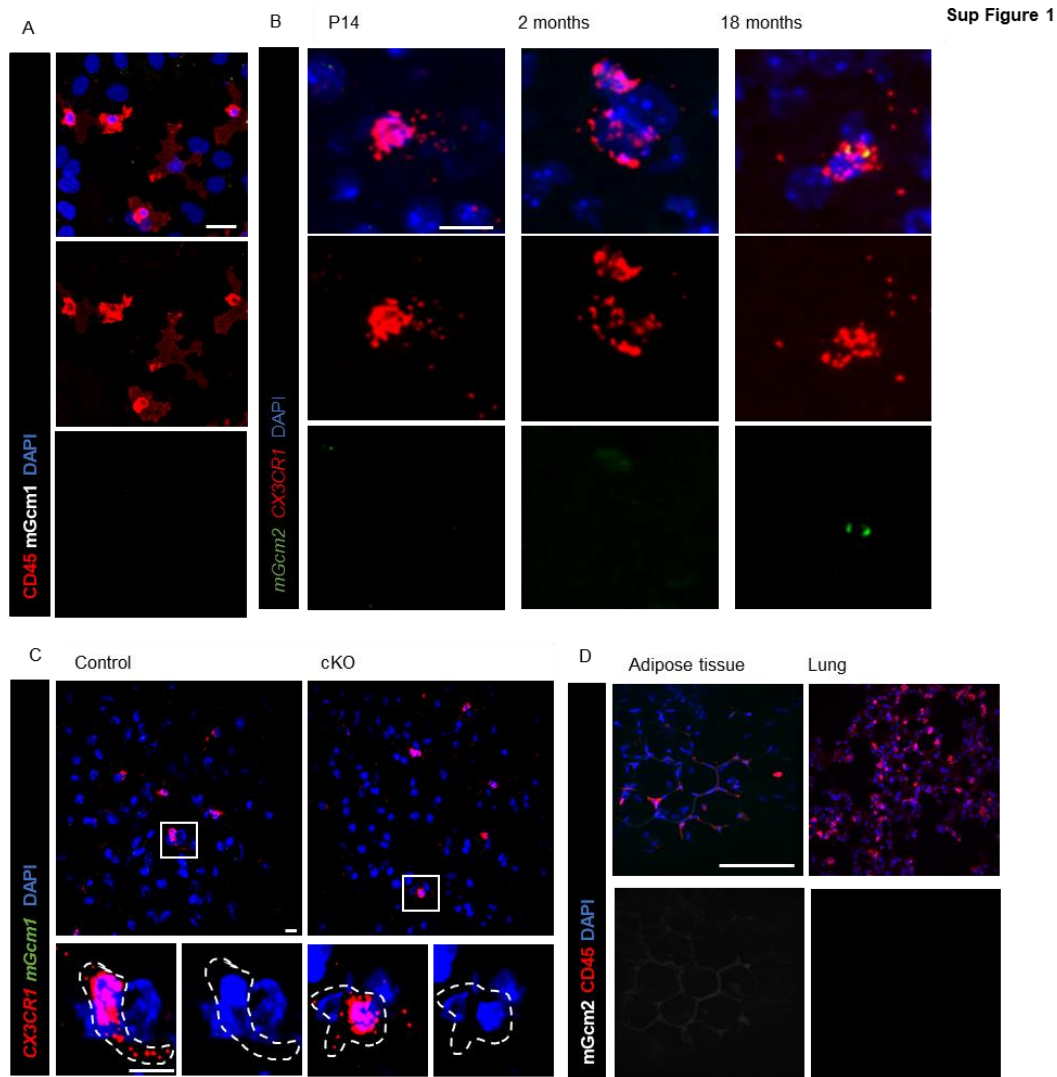

**Supplementary figure 1. mGcm1 and mGcm2 expression.** (A) Immunolabelling of CNS primary cultures for mGcm1 (grey), microglia (CD45, red) and DAPI (blue), N=3; scale bar 10  $\mu$ m. (B) RNA ISH of brain sections on P14, 2 and 18month-old brain sections from control and cko animals: *Cx3cr1* (red), *mGcm2* (green) and DAPI (blue), N=3; scale bar: 10  $\mu$ m. (C) RNAscope labelling on control and cKO brain sections at 18 months: *Cx3cr1* (red), *mGcm1* (green), DAPI (blue), N=3; scale bar: 10  $\mu$ m. (D) Immunolabelling of resident macrophages from lung and adipose tissues at 24month-old animals: mGcm2 (grey), CD45 (red) and DAPI (blue). Scale bar: 100  $\mu$ m. *Cx3cr1-Cre*<sup>+/-</sup>; *mGcm2*<sup>lox/</sup> (control) and *Cx3cr1-Cre*<sup>+/-</sup>; *mGcm2*<sup>lox/lox</sup> (cKO)

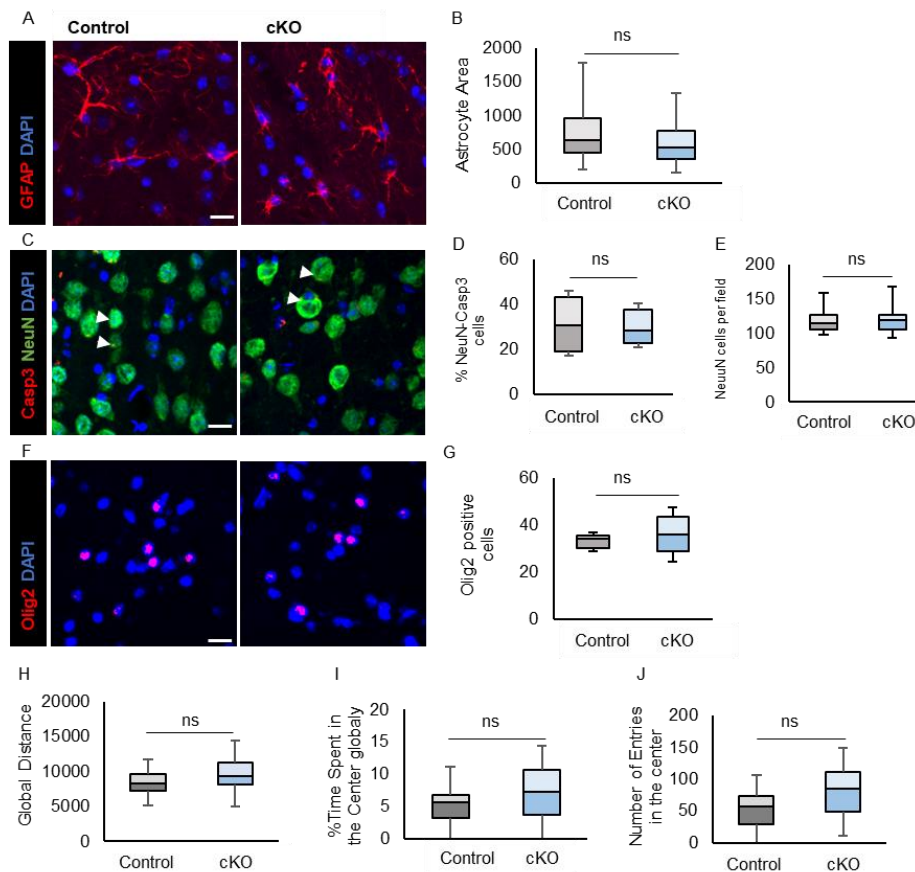

**Supplementary figure 2. Characterisation of cell populations in the cortex of 24month-old animals.** (A) Immunolabelling of astrocytes from control and cKO animals for GFAP (red). (B) Quantification of the GFAP area. (C) Immunolabelling of neurons with the pan neuronal marker NeuN (green) and the cell death marker Caspase3 (red). (D) Quantification for double positive NeuN-Caspase3 cells to calculate the neuronal cell death and (E) the total neuronal number. (F) Immunolabelling for oligodendrocytes with Olig2 and (G) quantification of oligodendrocytes in control and cKO animals. (H,J) Open field test for control and cKO animals at 18 months. The animals were evaluated for the total distance covered (H), the percentage of time spent in the centre (I) and how many times they entered in the centre (J). p-value: \* $<0.05$ , \*\* $<0.01$ , \*\*\* $<0.001$ , and ns for not significant. N=5-13; scale bar: 50  $\mu\text{m}$ . Statistical significance was determined by one-way ANOVA followed 2-tailed, unpaired t-test. *Cx3cr1-Cre*<sup>+/-</sup>; *mGcm2*<sup>fllox/</sup> (control) and *Cx3cr1-Cre*<sup>+/-</sup>; *mGcm2*<sup>fllox/fllox</sup> (cKO)

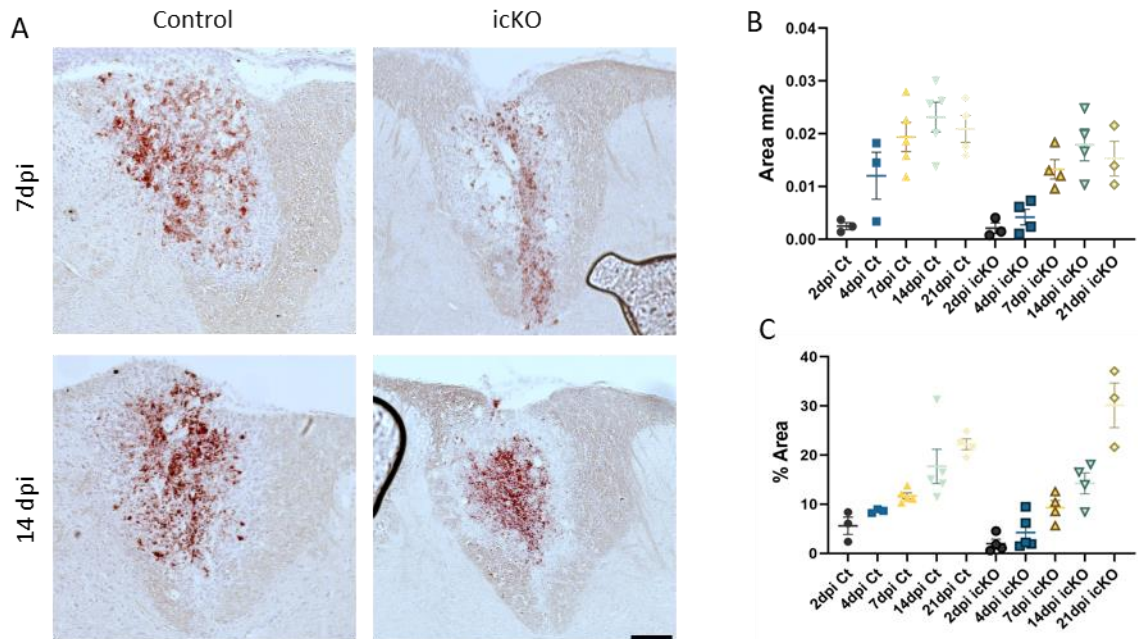

**Supplementary Figure 3. The density of macrophages containing myelin debris is not altered in LPC demyelinated lesions of *mGcm2* icKO mice.** (A) Oil-Red O staining of macrophages with myelin debris in control and *mGcm2* icKO LPC lesions, at 7 and 14 dpi. (B) Quantification of Oil-Red-O<sup>+</sup> area in LPC lesions from 2 to 21 dpi, in control and *mGcm2* icKO animals. (C) Percentage of Oil-Red-O<sup>+</sup> area in LPC lesions from 2 to 21 dpi in both experimental groups. Note that the clearance of myelin debris by macrophages in demyelinated lesions is not altered in *mGcm2* icKO with respect to control mice. Scale bar: (A), 100 $\mu$ m.

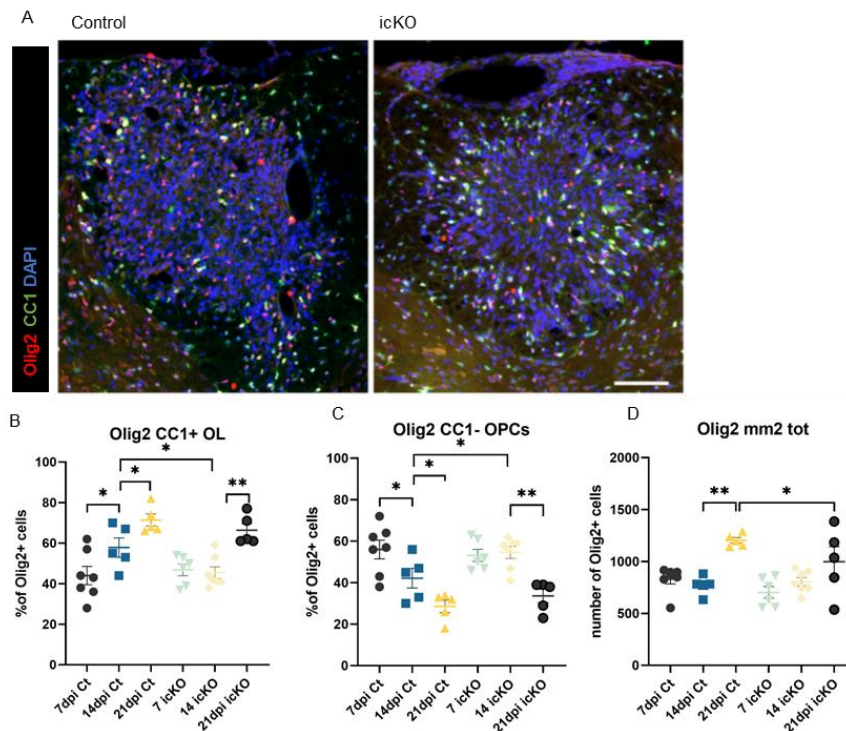

**Supplementary Figure 4. Loss of *mGcm2* function in microglia delays oligodendrocyte differentiation in demyelinated lesions.** (A) Immunolabelling with Olig2 (red) and CC1 (green) in LPC lesions of the spinal cord at 14 dpi, in control and *mGcm2* icKO mice. Nuclei are counterstained with DAPI. (B,C) Graphs indicating the percentage of Olig2/CC1-double positive differentiated oligodendrocytes and Olig2-positive/CC1-negative OPCs in demyelinated lesions from 7 to 21 dpi, in control and *mGcm2* icKO mice. (D) Quantification of the number of total Olig2-positive oligodendroglia in LPC lesions at 7, 14 and 21 dpi, in control and *mGcm2* icKO animals. Two-way ANOVA followed by Tukey's multiple comparison tests were used for statistical analysis. \* $p < 0.05$ , \*\* $p < 0.01$ . Scale bar: (A), 100  $\mu\text{m}$ .

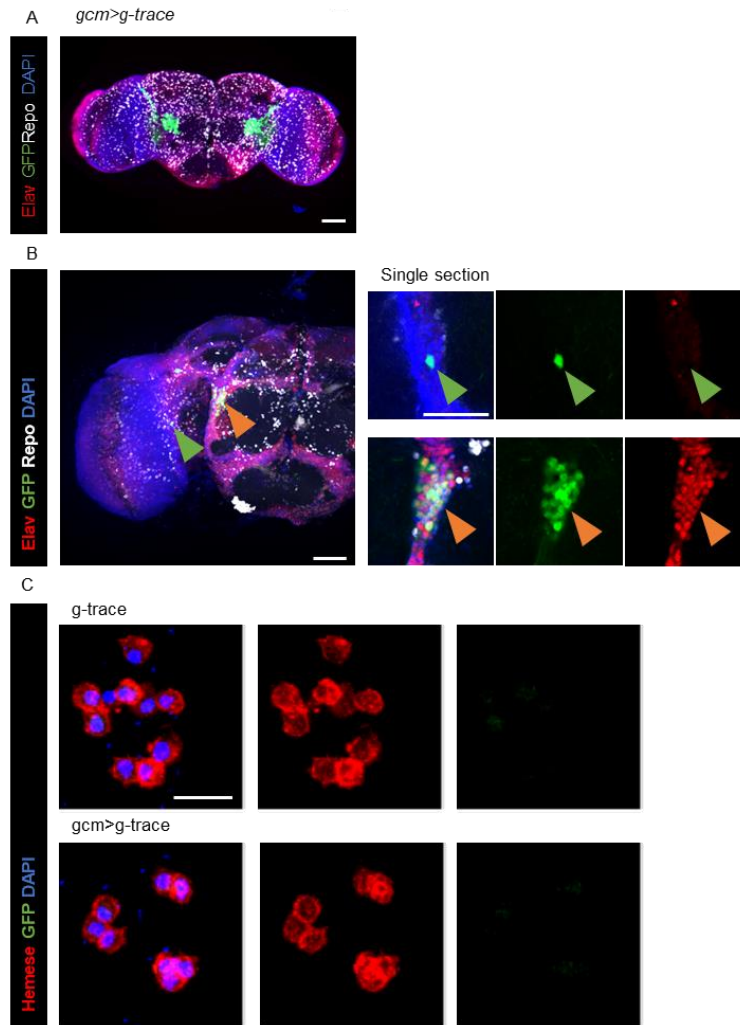

**Supplementary Figure 5. An inducible system tracing *gcm* expression.** (A) Immunolabelling of adult *Drosophila* brain with *gcm* tracing (*gcm>g-trace*=GFP) in green, Repo (white), Elav (white) and DAPI (blue). (B) Immunolabelling of adult *Drosophila* brain with *gcm* tracing (*gcm>g-trace*) in green, Repo (grey), Elav (red) and DAPI (blue), Scale bar: 20  $\mu$ m. (C) Immunolabelling of hemocytes from *gcm>g-trace* strain. The pan-hemocyte marker Hemese (red), *g-trace* (green), DAPI (blue). Animals were raised at 18°C and shifted at 29°C at second instar larval. scale bar: 20  $\mu$ m.

| Host    | Target               | Dilution | Reference                  |
|---------|----------------------|----------|----------------------------|
| mouse   | anti-Arginase1       | 1/200    | sc-271430                  |
| rat     | anti-CD11b           | 1/400    | MCA-74G                    |
| rat     | anti-CD45            | 1/50     | MCD-4500                   |
| rat     | anti-CD68            | 1/400    | MCA-1957                   |
| rat     | anti-F4/80           | 1/100    | MCA-497                    |
| rabbit  | anti-Gcm1            | 1/50     | B. Nait-Oumesmar           |
| rabbit  | anti-Gcm2            | 1/200    | ab201170                   |
| rabbit  | anti-Iba1            | 1/300    | 1919741                    |
| mouse   | anti-iNOS            | 1/100    | ab210823                   |
| mouse   | anti-GFAP            | 1/100    | PCN                        |
| mouse   | anti-NeuN            | 1/100    | ab279296                   |
| rabbit  | anti-Casp3           | 1/200    | mAb #9664                  |
| mouse   | anti-MOG             | 1/20     | clone C18C5, C. Linnington |
| rabbit  | anti-Olig2           | 1/400    | AB9610                     |
| mouse   | anti-APC             | 1/100    | OP80                       |
| mouse   | anti-HLA             | 1/100    | CR3/43                     |
| mouse   | anti-Repo            | 1/20     | 8D12 (DSHB)                |
| rat     | anti-Elav            | 1/100    | 7E8A10 (DSHB)              |
| mouse   | anti-Hemese          | 1/40     | I. Ando                    |
| mouse   | anti-L4              | 1/50     | I. Ando                    |
| chicken | anti-GFP             | 1/500    | 703095155                  |
| donkey  | anti-mouse-Cy3       | 1/500    | 715-165-151                |
| donkey  | anti-rabbit-Cy3      | 1/500    | 711-165-152                |
| goat    | anti-rat-Cy3         | 1/500    | 112-165-167                |
| goat    | anti-mouse-Alexa647  | 1/500    | 115-605-166                |
| goat    | anti-rabbit-Cy5      | 1/500    | 111-175-144                |
| goat    | anti-rat-Cy5         | 1/500    | 112-175-144                |
| donkey  | anti-chicken-FITC    | 1/500    | A11039                     |
| goat    | anti-rat-Alexa568    | 1/1000   | A11077                     |
| donkey  | anti-rat-Alexa488    | 1/1000   | A21208                     |
| donkey  | anti-rat-Alexa647    | 1/1000   | AB150155                   |
| donkey  | anti-rabbit-Alexa568 | 1/1000   | A10042                     |
| goat    | anti-mouse-Alexa488  | 1/1000   | 1070-02                    |
| donkey  | anti-mouse-Alexa488  | 1/1000   | A21202                     |
| goat    | anti-mouse-FITC      | 1/100    | A21141                     |

**Supplementary Table 1. Primary and secondary antibodies**

| MS cases       | Age | Sex | PMD | Disease duration | Disease course  | Lesions analyzed |                |                  |                |
|----------------|-----|-----|-----|------------------|-----------------|------------------|----------------|------------------|----------------|
|                |     |     |     |                  |                 | Active           | Chronic active | Chronic inactive | Shadow plaques |
| MS94CLA6       | 42  | F   | 11  | 6                | PP              | 1                |                |                  |                |
| MS100CLC2      | 46  | M   | 7   | 8                | SP              |                  |                | 1                |                |
| MS121CLC5      | 49  | F   | 24  | 14               | PR              | 1                |                | 1                |                |
| MS106L6C8      | 39  | F   | 18  | 21               | PP              |                  | 1              |                  |                |
| <b>Control</b> |     |     |     |                  |                 |                  |                |                  |                |
| C26CLA5        | 79  | F   | 18  |                  | Cardiac failure |                  |                |                  |                |

**Supplementary Table 2. MS and control cases used to study hGCM2 expression**

|     | <b>Target</b> | <b>Taqman probes</b>                                 |
|-----|---------------|------------------------------------------------------|
|     | Hprt          | HPRT TaqMan® Gene Expression Assays (Mm03024075_m1)  |
|     | mGcm2         | GCM2 TaqMan® Gene Expression Assays (Mm00492312_m1)  |
| M1  | iNOS          | NOS2 TaqMan® Gene Expression Assays (Mm00440502_m1)  |
| M1  | TLR2          | TLR2 TaqMan® Gene Expression Assays (Mm00442346_m1)  |
| M2a | Arg-1         | ARG1 TaqMan® Gene Expression Assays (Mm00475988_m1)  |
| M2b | Il-4ra        | IL-4a TaqMan® Gene Expression Assays (Mm01275139_m1) |
| M2c | CD163         | Cd163 TaqMan® Gene Expression Assays (Mm00474091_m1) |

**Supplementary Table 3. Taqman probes used for qRT-PCR analysis of LPC lesions**
